# Supplementary material for: CuO Nanorods Immobilized Agar-Alginate Biopolymer: A Green Functional Material for Photocatalytic Degradation of Amaranth Dye
Source: MDPI journal article supplement (doi:10.3390/polym15030553), 2023-01-21
Supplement: s1 [file s1]

**Table S1.** Design Table with actual vs predicted values of photocatalytic efficiency.

| Std | Run | Irradiation Time<br>(min) | pH      | AN Conc. ppm | Actual Value | Predicted Value |
|-----|-----|---------------------------|---------|--------------|--------------|-----------------|
| 1   | 1   | 30                        | 3       | 40           | 86.5702      | 86.31           |
| 2   | 2   | 45                        | 3       | 40           | 91.219       | 89.38           |
| 3   | 3   | 30                        | 5       | 40           | 86.5702      | 85.45           |
| 4   | 4   | 45                        | 5       | 40           | 87.1901      | 87.74           |
| 5   | 5   | 30                        | 3       | 80           | 95.4545      | 94.43           |
| 6   | 6   | 45                        | 3       | 80           | 95.0413      | 95.69           |
| 7   | 7   | 30                        | 5       | 80           | 91.374       | 92.74           |
| 8   | 8   | 45                        | 5       | 80           | 93.4401      | 93.23           |
| 9   | 9   | 24.8866                   | 4       | 60           | 88.4986      | 88.89           |
| 10  | 10  | 50.1134                   | 4       | 60           | 91.5978      | 91.88           |
| 11  | 11  | 37.5                      | 2.31821 | 60           | 95.0413      | 96.29           |
| 12  | 12  | 37.5                      | 5.68179 | 60           | 94.0771      | 93.50           |
| 13  | 13  | 37.5                      | 4       | 26.3641      | 79.621       | 80.98           |
| 14  | 14  | 37.5                      | 4       | 93.6359      | 93.1152      | 92.42           |
| 15  | 15  | 37.5                      | 4       | 60           | 95.7989      | 91.30           |
| 16  | 16  | 37.5                      | 4       | 60           | 91.2534      | 91.30           |
| 17  | 17  | 37.5                      | 4       | 60           | 88.4298      | 91.30           |
| 18  | 18  | 37.5                      | 4       | 60           | 90.6336      | 91.30           |
| 19  | 19  | 37.5                      | 4       | 60           | 91.1846      | 91.30           |
| 20  | 20  | 37.5                      | 4       | 60           | 90.6336      | 91.30           |

**Table S2.** Absorbance vs irradiation time at different AN concentration.

| AN Concentration<br>(mg L <sup>-1</sup> ) | Absorbance Values |          |          |          |          |
|-------------------------------------------|-------------------|----------|----------|----------|----------|
|                                           | 10 min            | 20 min   | 30 min   | 40 min   | 50 min   |
| 20                                        | 0.3632            | 0.227    | 0.151333 | 0.121067 | 0.106824 |
| 40                                        | 0.227             | 0.165091 | 0.121067 | 0.100889 | 0.086476 |
| 60                                        | 0.1816            | 0.139692 | 0.106824 | 0.0908   | 0.078957 |
| 80                                        | 0.151333          | 0.121067 | 0.100889 | 0.086476 | 0.07264  |
